# Supplementary material for: Non-thermal processing of cashews: irradiation reduces allergenicity by altering the structure of Ana o 3
Source: Royal Society of Chemistry journal article supplement (doi:10.1039/d2fo03057h), 2023-01-01

**Supplementary raw datas:**

Figure. 1 (A) Ana o 3 was purified by IEC, (M: marker; 1: total protein of the raw cashew; 2: purified Ana o 3).

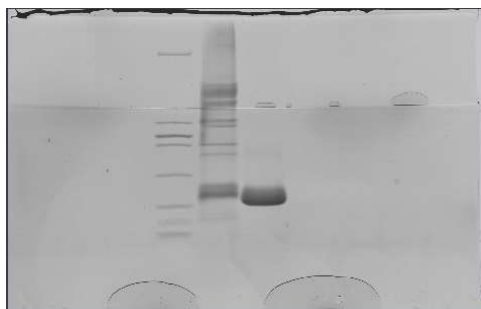

Figure. 1 (B): the irradiated Ana o 3 at different irradiation does. (M: marker; 1: untreated Ana o 3; 2-5: the irradiated Ana o 3 at 1, 3, 5, and 10 kGy, respectively).

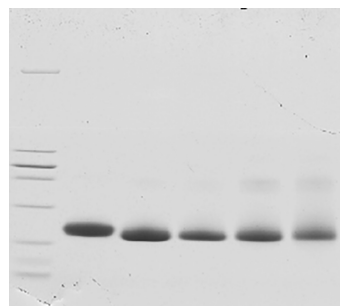

Figure. 4 (B) Tricine-SDS-PAGE, (M: marker. 1: untreated Ana o 3. 2-5: the irradiated Ana o 3 at doses 1, 3, 5, and 10 kGy, respectively).

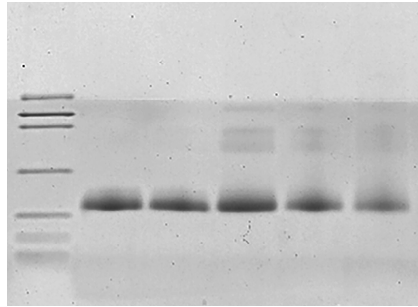

Figure. 4 (C) Immunoblotting, (1-5: Immunoblotting of Ana o 3 with 2F5 anti-Ana o 3 Human IgE Monoclonal Ab. 1: untreated Ana o 3. 2-5: the irradiated Ana o 3 at doses 1, 3, 5, and 10 kGy, respectively).

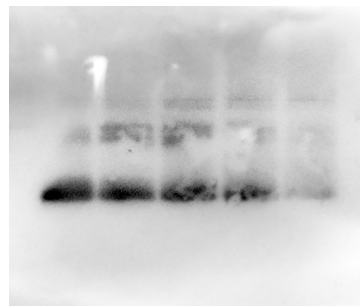

Supplement: d2fo03057h1.pdf [file d2fo03057h1.pdf]
