# Supplementary material for: Non-thermal processing of cashews: irradiation reduces allergenicity by altering the structure of Ana o 3
Source: Royal Society of Chemistry journal article supplement (doi:10.1039/d2fo03057h), 2023-01-01
Supplement: d2fo03057h2.xlsx [file d2fo03057h2.xlsx]

## Sheet: CD
BIO-KINE ASCII FILE
_COMMENT	MOS-450 Spectrometer
_COMMENT	Spectrum measurement
_COMMENT	Acq duration = 1 s
_COMMENT	Biokine V4.74
_UNITX	nm
_UNITY	MilliDegree
_DELTAX	0
_DATA
	0 kGy	1 kGy	3kGy	5kGy	10 kGy					a-Helix	β-Sheet	β-Turn	Ramdom coil
190	17.8793	16.2316	4.45581	13.6777	9.67861				0 kGy	46.8	10.8	18.7	23.7
191	18.5832	17.6208	7.22981	13.9742	10.1991				1 kGy	49.4	6.8	17.7	26.1
192	18.9179	18.5283	9.47954	14.0177	10.4491				3kGy	43.2	12.1	16.8	27.9
193	18.8835	18.9541	11.205	13.8081	10.4288				5kGy	37.6	11.7	17.4	33.3
194	18.4799	18.8982	12.4062	13.3455	10.138				10 kGy	30.9	16.2	20.7	32.2
195	17.7071	18.3606	13.0831	12.6298	9.5767
196	16.5652	17.3414	13.2358	11.6611	8.74502
197	15.0541	15.8404	12.8642	10.4393	7.6429
198	11.7078	11.1818	10.2328	6.84726	3.44308
199	9.99669	8.69897	9.61263	3.71858	1.60145
200	8.37785	7.37347	9.06085	3.25202	2.42547
201	6.27777	5.28573	5.99775	0.8607	1.54793
202	3.53115	2.63507	4.02664	-0.17775	0.04059
203	0.20082	0.12919	1.13672	-2.58994	-0.59074
204	-4.91878	-5.282	-2.9177	-5.11754	-3.46064
205	-7.74816	-9.11508	-6.63995	-7.54055	-6.51089
206	-11.263	-12.0114	-9.548	-9.71765	-8.14058
207	-12.607	-14.1953	-11.981	-11.0399	-8.70254
208	-13.7953	-15.4828	-12.5835	-12.2945	-9.16174
209	-15.413	-15.957	-13.1576	-12.7289	-9.12679
210	-15.6058	-17.0474	-12.008	-12.9262	-8.18965
211	-16.7804	-18.6215	-12.199	-14.165	-8.76937
212	-17.3576	-18.9701	-13.0321	-13.8703	-9.47266
213	-16.8847	-18.1736	-13.0874	-13.5778	-9.15768
214	-16.4812	-17.3413	-13.5795	-13.2885	-9.06603
215	-15.7524	-16.2774	-13.7776	-12.9227	-8.26822
216	-15.7489	-15.9496	-13.7489	-12.8839	-8.43078
217	-16.574	-16.3118	-14.8422	-14.0722	-9.62519
218	-17.2039	-17.0934	-16.0147	-14.8742	-10.5692
219	-17.2737	-17.1017	-15.9477	-15.6163	-11.0026
220	-16.737	-17.3314	-15.8663	-15.5862	-11.1522
221	-16.4581	-17.0494	-15.1851	-14.8411	-10.9769
222	-15.9523	-16.7923	-14.2588	-14.4586	-10.5681
223	-15.4614	-16.231	-13.2167	-13.7135	-9.95159
224	-14.8784	-16.124	-12.918	-13.3113	-9.5245
225	-14.9889	-15.7687	-12.8579	-13.5284	-9.24595
226	-14.6623	-15.2393	-12.6088	-12.8372	-8.90654
227	-14.0397	-14.4601	-12.0346	-11.8106	-8.20454
228	-13.0697	-13.2079	-11.5367	-10.9977	-7.32217
229	-11.95	-11.6671	-10.2951	-10.1353	-6.5483
230	-11.2587	-10.6866	-9.48854	-9.29779	-5.95726
231	-10.3784	-9.55317	-8.5255	-8.30588	-5.28667
232	-9.39825	-8.50899	-7.54228	-7.13339	-4.4138
233	-8.67335	-7.83581	-6.66418	-6.28522	-4.04602
234	-7.57983	-7.13496	-5.65769	-5.43	-3.42929
235	-6.33451	-5.64412	-4.24376	-4.22149	-2.49269
236	-4.95334	-4.34267	-2.72435	-2.76432	-1.48801
237	-4.14535	-3.53249	-1.8628	-1.97983	-0.77272
238	-3.57331	-2.85821	-1.30617	-1.35819	-0.416
239	-3.47244	-2.35036	-1.06715	-1.27899	-0.33802
240	-3.17477	-2.02981	-0.77933	-0.95605	-0.05641
241	-2.61419	-1.52831	-0.33697	-0.53302	0.46939
242	-2.36968	-0.96768	-0.21607	-0.13407	0.5599
243	-1.56836	-0.30786	0.51923	0.55549	0.93384
244	-1.15505	0.15792	0.88084	0.93407	1.22486
245	-0.7812	0.57013	1.19579	1.2815	1.51284
246	-0.44682	0.92878	1.46409	1.59778	1.79781
247	-0.1519	1.23387	1.68574	1.8829	2.07975
248	0.10356	1.48539	1.86072	2.13687	2.35867
249	0.31955	1.68335	1.98906	2.35969	2.63456
250	0.49608	1.82775	2.07073	2.55135	2.90743

## Sheet: fluorescence spectrum
Instrument										Instrument
Model:	F-4500 FL Spectrophotometer									Model:	F-4500 FL Spectrophotometer
Serial number:	2142-008									Serial number:	2142-008
ROM Version:	5J14000 12									ROM Version:	5J14000 12
Instrument parameters										Instrument parameters
Measurement type:	Wavelength scan									Measurement type:	Wavelength scan
Scan mode:	Emission									Scan mode:	Emission
Data mode:	Fluorescence									Data mode:	Fluorescence
EX WL:	280.0 nm									EX WL:	390.0 nm
EM Start WL:	290.0 nm									EM Start WL:	400.0 nm
EM End WL:	450.0 nm									EM End WL:	650.0 nm
Scan speed:	1200 nm/min									Scan speed:	1200 nm/min
Delay:	0.0 s									Delay:	0.0 s
EX Slit:	2 nm									EX Slit:	5.0 nm
EM Slit:	2nm									EM Slit:	5.0 nm
PMT Voltage:	600 V									PMT Voltage:	600 V
Response:	4.0 s									Response:	4.0 s
Corrected spectra:	Off									Corrected spectra:	Off
Shutter control:	Off									Shutter control:	Off
Peak integration										Peak integration
Integration method:	Rectangular									Integration method:	Rectangular
Sensitivity:	1									Sensitivity:	1
Threshold:	1									Threshold:	1
	0 kGy	1 kGy	3kGy	5kGy	10 kGy						0 kGy	1 kGy	3kGy	5kGy	10 kGy
300	385.7	390.967	377.933	339.333	216.233					400	126.067	127.333	127	118.267	126.6
301	396.333	401.3	387.933	348.2	221.767					401	124.733	125.867	125.667	116.967	125.267
302	406.767	411.367	397.667	356.733	227.033					402	122.533	123.633	123.467	114.9	123.067
303	417.1	421.2	406.933	365.2	232.333					403	120.2	121.133	121.033	112.633	120.733
304	426.867	430.733	416.033	373.167	237.433					404	117.7	118.5	118.5	110.3	118.267
305	436.433	439.6	424.5	380.733	242.033					405	115.1	115.767	115.867	107.833	115.733
306	445.333	447.933	432.5	387.9	246.633					406	112.567	113.033	113.233	105.4	113.233
307	453.667	455.633	439.8	394.533	251					407	110.033	110.333	110.633	103	110.767
308	461.733	463	446.6	400.7	255.1					408	107.567	107.7	108.067	100.68	108.367
309	469.067	469.7	452.7	406.333	259					409	105.167	105.167	105.633	98.4433	106.033
310	475.733	475.533	458.167	411.4	262.467					410	102.967	102.8	103.267	96.3333	103.9
311	481.533	480.333	462.767	415.533	265.467					411	100.9	100.51	101.167	94.3733	101.867
312	486.267	484.2	466.433	418.7	267.767					412	98.9867	98.4333	99.11	92.5433	100.023
313	489.933	486.667	468.633	420.633	269.333					413	97.2467	96.5167	97.2633	90.91	98.3767
314	492.533	488.167	470	421.733	270.1					414	95.7133	94.7867	95.59	89.4533	96.9167
315	494.3	488.667	470.233	421.9	270.4					415	94.3167	93.21	94.08	88.1667	95.6167
316	495.367	488.367	469.9	421.4	270.233					416	93.1033	91.7767	92.7567	87.0667	94.48
317	495.567	487.467	468.833	420.3	269.7					417	92.0233	90.49	91.5733	86.0933	93.5233
318	495.2	485.833	466.867	418.633	268.833					418	91.0933	89.3267	90.52	85.2833	92.7133
319	494	483.4	464.333	416.167	267.467					419	90.3467	88.3433	89.62	84.6133	92.08
320	492.367	480.3	461.133	413.267	265.633					420	89.7467	87.5033	88.8967	84.14	91.5967
321	490.133	476.733	457.433	409.8	263.533					421	89.3367	86.8167	88.35	83.81	91.32
322	487.3	472.633	453.2	405.9	261.3					422	89.1233	86.27	87.9767	83.67	91.2067
323	484.1	468.067	448.4	401.6	258.6					423	89.0633	85.8967	87.8	83.7367	91.2933
324	480.367	463	443.2	396.8	255.9					424	89.23	85.7267	87.8167	83.9767	91.5633
325	476.233	457.667	437.5	391.7	252.933					425	89.5867	85.7167	88.0233	84.4667	92.07
326	471.7	451.9	431.567	386.333	249.733					426	90.1367	85.88	88.4	85.13	92.7433
327	466.967	445.833	425.367	380.633	246.367					427	90.87	86.2233	88.9833	85.99	93.6533
328	461.933	439.433	418.833	374.633	242.767					428	91.79	86.77	89.7767	87.07	94.7767
329	456.433	432.8	412.033	368.5	239.033					429	92.9633	87.4633	90.8033	88.3767	96.1033
330	450.8	425.967	405.067	362.1	235.167					430	94.34	88.3767	91.99	89.84	97.6933
331	445.1	419.033	397.967	355.667	231.267					431	95.8933	89.4833	93.39	91.5533	99.4233
332	439.167	411.933	390.767	349.133	227.3					432	97.63	90.7567	94.95	93.45	101.4
333	433.167	404.833	383.433	342.4	223.2					433	99.5667	92.1967	96.7167	95.6	103.6
334	426.867	397.6	376	335.6	219.133					434	101.667	93.8167	98.67	97.9433	106.067
335	420.3	390.267	368.467	328.733	215					435	104.033	95.6333	100.807	100.51	108.667
336	413.9	383	361.033	322	210.833					436	106.567	97.6067	103.133	103.267	111.533
337	407.467	375.733	353.5	315.2	206.7					437	109.267	99.77	105.667	106.233	114.6
338	400.9	368.4	346	308.367	202.567					438	112.167	102.107	108.433	109.367	117.867
339	394.333	360.967	338.5	301.467	198.467					439	115.267	104.633	111.4	112.767	121.4
340	387.567	353.533	331	294.6	194.4					440	118.5	107.3	114.567	116.367	125.167
341	380.833	346.233	323.5	287.833	190.4					441	121.967	110.167	117.933	120.2	129.067
342	374.1	338.967	316.033	281.033	186.367					442	125.567	113.2	121.467	124.233	133.3
343	367.3	331.7	308.7	274.333	182.333					443	129.433	116.4	125.2	128.5	137.767
344	360.5	324.467	301.4	267.667	178.333					444	133.467	119.833	129.167	133.033	142.5
345	353.833	317.333	294.133	261.067	174.4					445	137.667	123.367	133.3	137.767	147.367
346	347	310.4	286.967	254.633	170.5					446	142.067	127.133	137.533	142.6	152.433
347	340.367	303.4	279.967	248.367	166.667					447	146.533	131	142.033	147.667	157.733
348	333.733	296.5	273	242.033	162.767					448	151.167	135	146.7	152.967	163.2
349	327.033	289.633	266.267	235.867	159					449	156	139.167	151.533	158.4	168.9
350	320.333	283	259.467	229.767	155.3					450	160.9	143.433	156.433	163.967	174.7
351	313.7	276.3	252.867	223.833	151.733					451	165.833	147.733	161.433	169.6	180.567
352	307.133	269.733	246.467	217.967	148.133					452	170.8	152.133	166.433	175.267	186.567
353	300.6	263.333	240.067	212.233	144.633					453	175.833	156.5	171.467	180.933	192.6
354	294.167	257.033	233.833	206.633	141.167					454	180.867	160.833	176.533	186.8	198.733
355	287.633	250.767	227.633	201.067	137.8					455	185.8	165.267	181.633	192.6	204.9
356	281.267	244.767	221.633	195.7	134.433					456	190.867	169.567	186.733	198.467	211.033
357	275	238.8	215.8	190.4	131.167					457	195.8	173.867	191.833	204.333	217.1
358	268.767	232.967	210.033	185.267	128.033					458	200.767	178.2	196.833	210.233	223.333
359	262.533	227.167	204.4	180.267	124.867					459	205.733	182.5	201.867	216.1	229.5
360	256.467	221.6	198.867	175.367	121.867					460	210.6	186.8	206.9	221.933	235.7
361	250.5	216.067	193.433	170.5	118.9					461	215.467	191.033	211.933	227.8	241.867
362	244.567	210.667	188.167	165.833	116.033					462	220.333	195.3	216.933	233.7	248.033
363	238.767	205.433	183.067	161.233	113.2					463	225.167	199.633	222	239.6	254.167
364	233.067	200.233	178	156.8	110.4					464	229.967	203.867	226.933	245.5	260.333
365	227.367	195.1	173.067	152.467	107.7					465	234.733	208.033	231.867	251.333	266.5
366	221.8	190.133	168.267	148.233	105.1					466	239.367	212.167	236.8	257.1	272.6
367	216.333	185.267	163.667	144.2	102.533					467	244.067	216.3	241.667	262.833	278.667
368	211	180.533	159.033	140.167	100.05					468	248.6	220.433	246.433	268.5	284.667
369	205.733	175.833	154.6	136.167	97.5667					469	253.167	224.567	251.233	274.067	290.6
370	200.567	171.267	150.267	132.333	95.2367					470	257.567	228.733	255.9	279.633	296.467
371	195.467	166.8	146.067	128.667	92.98					471	261.967	232.633	260.5	285.067	302.233
372	190.433	162.433	141.967	125.1	90.7567					472	266.233	236.567	265.1	290.5	307.967
373	185.5	158.167	137.967	121.6	88.6133					473	270.4	240.4	269.533	295.767	313.567
374	180.733	154	134.1	118.233	86.4967					474	274.433	244.167	273.933	301	319.1
375	176	149.967	130.367	115	84.4533					475	278.433	247.833	278.233	306.067	324.467
376	171.367	145.967	126.7	111.767	82.4467					476	282.267	251.4	282.433	311.033	329.767
377	166.833	142.067	123.167	108.7	80.5667					477	286	254.933	286.467	315.967	334.9
378	162.333	138.267	119.733	105.667	78.6967					478	289.7	258.367	290.533	320.8	339.9
379	157.933	134.567	116.367	102.733	76.8867					479	293.233	261.867	294.5	325.5	344.9
380	153.7	130.933	113.1	99.93	75.11					480	296.767	265.267	298.333	330.067	349.733
381	149.533	127.433	109.9	97.2167	73.4067					481	300.2	268.6	302.033	334.567	354.433
382	145.467	123.967	106.833	94.59	71.7533					482	303.5	271.767	305.733	338.933	359.067
383	141.433	120.633	103.833	92.0033	70.1433					483	306.7	274.867	309.267	343.167	363.567
384	137.5	117.333	100.927	89.5633	68.6033					484	309.833	277.9	312.733	347.3	367.867
385	133.7	114.167	98.1133	87.19	67.1167					485	312.867	280.833	316.033	351.367	372.067
386	129.967	111.067	95.39	84.86	65.69					486	315.767	283.767	319.267	355.2	376.067
387	126.3	108.067	92.7533	82.6267	64.2767					487	318.567	286.533	322.433	358.933	380.033
388	122.7	105.1	90.1933	80.4533	62.9267					488	321.233	289.167	325.433	362.5	383.8
389	119.233	102.2	87.6967	78.2967	61.6233					489	323.9	291.733	328.367	365.967	387.367
390	115.867	99.3667	85.3033	76.2233	60.3333					490	326.267	294.167	331.133	369.267	390.7
391	112.533	96.6333	82.93	74.2667	59.0967					491	328.633	296.567	333.733	372.4	393.967
392	109.3	93.9633	80.6667	72.3833	57.87					492	330.733	298.833	336.167	375.3	397
393	106.233	91.3567	78.4067	70.5233	56.71					493	332.733	300.967	338.5	378.133	399.767
394	103.2	88.8267	76.2867	68.7667	55.5767					494	334.6	302.967	340.633	380.7	402.367
395	100.257	86.39	74.2	67.0333	54.4667					495	336.333	304.833	342.6	383.133	404.9
396	97.3533	83.96	72.2233	65.34	53.4333					496	337.967	306.533	344.467	385.4	407.1
397	94.57	81.6267	70.3167	63.68	52.4					497	339.4	308.1	346.067	387.433	409.2
398	91.8067	79.37	68.4	62.06	51.3567					498	340.7	309.6	347.6	389.267	411.033
399	89.1533	77.16	66.5467	60.5133	50.3733					499	341.867	310.867	348.933	390.933	412.633
400	86.5667	75	64.7467	59.0067	49.3967					500	342.867	312.133	350.1	392.4	414.067
										501	343.767	313.2	351.2	393.733	415.3
										502	344.533	314.133	352.1	394.9	416.4
										503	345.1	314.967	352.867	395.933	417.233
										504	345.6	315.6	353.467	396.7	417.867
										505	345.967	316.133	353.933	397.2	418.3
										506	346.167	316.6	354.267	397.7	418.633
										507	346.267	316.9	354.433	397.967	418.767
										508	346.233	317.1	354.433	398.067	418.767
										509	345.967	317.233	354.367	398.1	418.6
										510	345.633	317.233	354.2	397.933	418.167
										511	345.2	317.067	353.833	397.567	417.667
										512	344.633	316.933	353.3	397.033	416.967
										513	344.033	316.5	352.767	396.433	416.133
										514	343.233	316	352	395.667	415.167
										515	342.333	315.433	351.1	394.767	413.967
										516	341.3	314.767	350.133	393.7	412.667
										517	340.2	314.033	349.033	392.467	411.233
										518	339.033	313.133	347.833	391.167	409.7
										519	337.667	312.2	346.433	389.633	407.9
										520	336.233	311.067	344.933	387.933	406
										521	334.667	309.833	343.267	386.2	404
										522	332.933	308.5	341.567	384.367	401.867
										523	331.167	307.1	339.767	382.3	399.6
										524	329.267	305.567	337.8	380.133	397.1
										525	327.233	303.9	335.767	377.767	394.5
										526	325.1	302.167	333.567	375.333	391.8
										527	322.867	300.3	331.267	372.733	388.9
										528	320.5	298.267	328.8	369.967	385.867
										529	318.067	296.133	326.2	367.1	382.667
										530	315.467	293.933	323.533	364.1	379.333
										531	312.733	291.6	320.767	360.933	375.933
										532	309.933	289.167	317.867	357.6	372.4
										533	307.033	286.7	314.867	354.2	368.667
										534	304.067	284.067	311.733	350.7	364.867
										535	300.867	281.267	308.433	346.967	360.9
										536	297.667	278.367	305.1	343.167	356.8
										537	294.333	275.4	301.667	339.3	352.533
										538	290.933	272.433	298.1	335.267	348.233
										539	287.367	269.3	294.467	331.2	343.833
										540	283.833	266.067	290.733	326.967	339.3
										541	280.233	262.8	286.967	322.733	334.667
										542	276.5	259.4	283.133	318.4	330.033
										543	272.6	255.933	279.167	313.933	325.267
										544	268.733	252.4	275.167	309.367	320.4
										545	264.767	248.9	271.1	304.8	315.5
										546	260.733	245.267	267.033	300.133	310.567
										547	256.8	241.667	262.9	295.433	305.6
										548	252.833	238	258.7	290.7	300.667
										549	248.7	234.267	254.533	285.967	295.6
										550	244.667	230.533	250.267	281.2	290.567
										551	240.533	226.8	246.033	276.367	285.467
										552	236.433	223.033	241.767	271.533	280.4
										553	232.3	219.2	237.567	266.7	275.233
										554	228.2	215.4	233.333	261.967	270.167
										555	224.1	211.6	229.033	257.133	265.1
										556	220	207.867	224.767	252.3	260.033
										557	215.933	204.033	220.533	247.533	255
										558	211.833	200.267	216.333	242.767	250.033
										559	207.767	196.467	212.133	238.033	245
										560	203.7	192.767	207.933	233.333	240.1
										561	199.667	189.033	203.833	228.633	235.2
										562	195.7	185.333	199.7	224	230.367
										563	191.733	181.7	195.667	219.4	225.533
										564	187.9	178.033	191.633	214.9	220.8
										565	184	174.4	187.633	210.333	216.1
										566	180.1	170.867	183.7	205.867	211.433
										567	176.333	167.3	179.833	201.467	206.9
										568	172.567	163.833	175.967	197.1	202.333
										569	168.867	160.4	172.167	192.867	197.9
										570	165.267	157.033	168.433	188.633	193.467
										571	161.667	153.633	164.733	184.433	189.1
										572	158.133	150.367	161.133	180.333	184.833
										573	154.7	147.1	157.533	176.333	180.6
										574	151.233	143.9	154	172.3	176.467
										575	147.867	140.7	150.533	168.367	172.367
										576	144.5	137.567	147.1	164.533	168.367
										577	141.233	134.5	143.733	160.733	164.433
										578	138.033	131.467	140.433	157.033	160.567
										579	134.867	128.5	137.2	153.3	156.733
										580	131.767	125.633	134	149.7	153
										581	128.733	122.767	130.833	146.2	149.367
										582	125.767	119.933	127.767	142.733	145.767
										583	122.8	117.167	124.733	139.333	142.267
										584	119.9	114.467	121.733	136	138.833
										585	117.1	111.8	118.867	132.7	135.467
										586	114.3	109.167	116	129.467	132.133
										587	111.6	106.633	113.2	126.333	128.867
										588	108.933	104.1	110.5	123.267	125.7
										589	106.3	101.633	107.833	120.2	122.6
										590	103.767	99.2033	105.233	117.233	119.5
										591	101.233	96.83	102.633	114.367	116.533
										592	98.7533	94.4967	100.14	111.467	113.6
										593	96.33	92.2	97.67	108.733	110.733
										594	93.9433	89.9433	95.22	105.967	107.933
										595	91.6067	87.75	92.8667	103.3	105.167
										596	89.3333	85.5867	90.5433	100.697	102.5
										597	87.1033	83.4633	88.2667	98.1367	99.8767
										598	84.91	81.39	86.0367	95.6133	97.2767
										599	82.7433	79.3633	83.8467	93.1467	94.7567
										600	80.64	77.3767	81.6933	90.7467	92.2833
										601	78.5733	75.4133	79.6067	88.3933	89.8667
										602	76.5567	73.4967	77.5433	86.09	87.5033
										603	74.5867	71.62	75.5467	83.8433	85.1867
										604	72.67	69.8033	73.5867	81.65	82.9367
										605	70.7833	68.0333	71.6633	79.4933	80.73
										606	68.9667	66.2833	69.7967	77.39	78.5733
										607	67.1867	64.59	67.96	75.3367	76.48
										608	65.4633	62.94	66.1933	73.3433	74.4433
										609	63.7633	61.33	64.46	71.3767	72.4567
										610	62.11	59.74	62.7667	69.4933	70.5
										611	60.4833	58.1867	61.1167	67.6367	68.6133
										612	58.8867	56.6533	59.5033	65.8333	66.7633
										613	57.3267	55.1833	57.95	64.0533	64.9767
										614	55.8133	53.7333	56.4067	62.3267	63.2
										615	54.3367	52.3167	54.9067	60.6467	61.4833
										616	52.89	50.9267	53.44	59.0067	59.8
										617	51.47	49.58	51.9967	57.4	58.1667
										618	50.1	48.25	50.6	55.8333	56.56
										619	48.7533	46.9733	49.24	54.3067	55.01
										620	47.44	45.73	47.9167	52.8233	53.51
										621	46.17	44.5	46.62	51.38	52.02
										622	44.92	43.3067	45.3433	49.9567	50.57
										623	43.7033	42.14	44.1	48.5767	49.1667
										624	42.5233	41.0033	42.8967	47.2267	47.7867
										625	41.3633	39.89	41.7133	45.9267	46.4467
										626	40.2233	38.8067	40.5767	44.6367	45.15
										627	39.12	37.7567	39.4567	43.39	43.8867
										628	38.0467	36.7367	38.38	42.1667	42.6533
										629	37.01	35.74	37.3133	40.99	41.45
										630	36.0033	34.7733	36.28	39.8433	40.2833
										631	35.0167	33.8233	35.2867	38.7133	39.1467
										632	34.04	32.8933	34.2933	37.6233	38.0367
										633	33.0967	31.9933	33.3433	36.5533	36.96
										634	32.1933	31.12	32.4067	35.52	35.9167
										635	31.3	30.2767	31.5033	34.5133	34.8967
										636	30.44	29.45	30.6167	33.5433	33.91
										637	29.5867	28.64	29.7667	32.5933	32.94
										638	28.7667	27.8533	28.9433	31.6633	31.99
										639	27.9667	27.0933	28.1467	30.7567	31.07
										640	27.1833	26.3467	27.3667	29.8867	30.1933
										641	26.43	25.6167	26.6067	29.0267	29.3367
										642	25.7	24.9133	25.8533	28.2033	28.49
										643	24.98	24.2267	25.1333	27.4067	27.67
										644	24.2767	23.5633	24.4267	26.6133	26.8733
										645	23.6	22.91	23.74	25.8567	26.0967
										646	22.9267	22.2767	23.0833	25.1067	25.3667
										647	22.2867	21.6633	22.4333	24.39	24.6467
										648	21.66	21.0733	21.81	23.7	23.95
										649	21.0567	20.4933	21.2033	23.0267	23.2567
										650	20.47	19.9467	20.62	22.3733	22.5933

## Sheet: indirect competitive ELISA
				0 kGy			1 kGy			3 kGy			5 kGy			10 kGy
			50 μg/mL	94.224	94.1877	94.2865	93.7647	93.4579	93.7224	85.936	87.3127	85.8207	85.3412	86.3559	86.2632	71.0364	70.55	70.6344
			5 μg/mL	89.9357	90.9765	90.3067	90.7233	91.2216	91.3813	76.667	77.3934	76.2813	78.048	79.3137	78.2204	53.6363	56.078	55.1326
			2.5 μg/mL	78.8502	77.9788	78.3598	83.1551	83.3509	82.7524	63.8606	63.9665	62.5577	58.5696	58.8567	57.7137	41.5666	39.4489	44.574
			1 μg/mL	57.7934	56.4601	55.8381	69.7898	69.7399	69.3824	46.8223	47.8938	48.0989	44.9935	45.4383	37.9091	22.7317	21.6591	20.2651
			0.5 μg/mL	48.6192	47.7786	46.659	49.6969	49.5076	49.6981	31.3795	37.0259	32.667	31.1765	31.3189	32.5975	14.5229	14.1339	15.4967

## Sheet: KU812 cell degranulation assay 
		0 kGy	1 kGy	3kGy	5kGy	10 kGy
		584.732	564.8	515.514	515.168	492.659
	IL-6 (pg/mL)	556.005	541.436	538.736	551.368	484.614
		577.927	534.286	563.764	532.545	443.65
		0 kGy	1 kGy	3kGy	5kGy	10 kGy
		20.1326	19.7961	17.6042	15.7336	14.7437
	Histamine (ng/mL)	20.5649	19.8426	17.03	15.9258	15.3623
		20.6109	19.9425	17.7114	15.1787	16.0683
		0 kGy	1 kGy	3kGy	5kGy	10 kGy
		75.1259	75.2177	67.5546	67.4352	66.0133
	TNF-α level (pg/mL)	76.6354	70.3797	68.1201	66.5258	66.4247
		68.6568	70.3797	65.5444	68.3735	65.3034
